# Supplementary material for: Antimicrobial and Antibiofilm Activities of Sulfated Polysaccharides from Marine Algae against Dental Plaque Bacteria
Source: PubMed Central journal article supplement (PMC6165115; doi:10.3390/md16090301), 2018-08-27

# Supplementary Information

*Article*

## **Antimicrobial and Antibiofilm Activities of Sulfated Polysaccharides from Marine Algae against Dental Plaque Bacteria**

Joon-Young Jun <sup>1</sup>, Min-Jeong Jung <sup>1</sup>, In-Hak Jeong <sup>2</sup>, Koji Yamazaki <sup>3</sup>, Yuji Kawai <sup>3</sup> and Byoung-Mok Kim <sup>1,\*</sup>

**Figure S1.** Calibration curve and chromatogram of pullulan.

**Cirrus GPC Calibration Report**

Generated by: GPC  
 Workbook: C:\Cirrus Workbooks\171106\171106.plw  
 Method: 171106\_POLYSAC

Monday, November 06, 2017 4:22 PM

**Calibration: 11/6/2017 4:20:12 PM**

Calibration Type: Narrow Standard  
 Calibration Curve:  $12.98 - 0.512x^{\wedge}1$

Curve Fit Used: 1

High Limit MW RT: 13.90 mins

High Limit MW: 725144

K: 14.1000

Alpha: 0.7000

FRCF: 1.0000

Residual Sum Of Squares: 0.036603

Coeff. Of Determination: 0.996982

Linear Correlation Coeff.: -0.998490

Low Limit MW RT: 20.82 mins

Low Limit MW: 206

FRM Name:

Flow Marker RT: 0.00 mins

Corrected Sum Of Squares: 12.127510

Standard Y Error Estimate: 0.067641

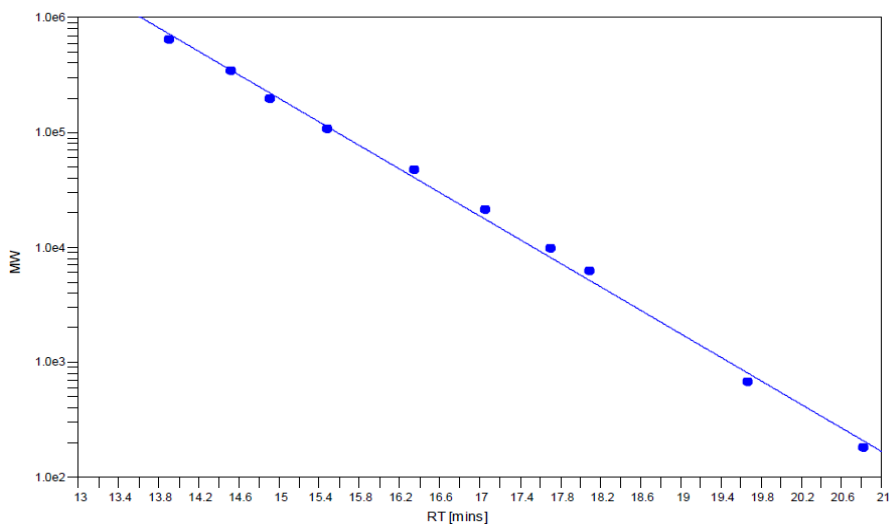

**Calibration Points**

| Pt | Peak Max RT (mins) | MW     | Log MW | Point in Use? | Percent Error |
|----|--------------------|--------|--------|---------------|---------------|
| 1  | 13.90              | 642000 | 5.808  | Yes           | -12.95        |
| 2  | 14.52              | 337000 | 5.528  | Yes           | -3.69         |
| 3  | 14.90              | 194000 | 5.288  | Yes           | -13.89        |
| 4  | 15.48              | 107000 | 5.029  | Yes           | -4.71         |
| 5  | 16.34              | 47100  | 4.673  | Yes           | 14.11         |
| 6  | 17.05              | 21100  | 4.324  | Yes           | 16.55         |
| 7  | 17.70              | 9600   | 3.982  | Yes           | 14.56         |
| 8  | 18.09              | 6100   | 3.785  | Yes           | 14.98         |
| 9  | 19.67              | 667    | 2.824  | Yes           | -20.13        |
| 10 | 20.82              | 180    | 2.255  | Yes           | -14.46        |

(continued)

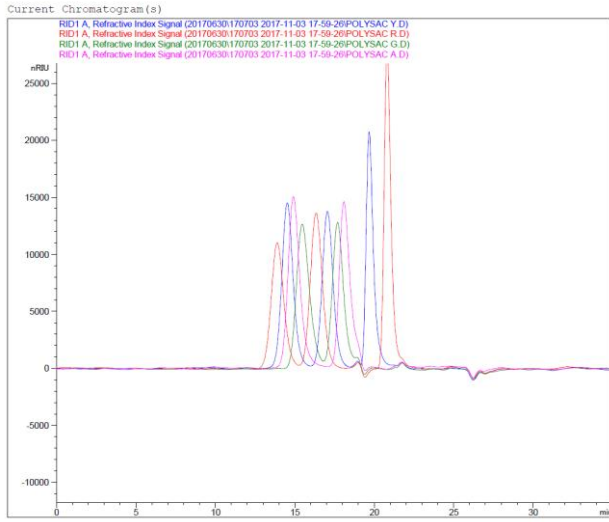

**Figure S2.** GPC profile of the fucoidan F85 before heat treatment (121 °C for 15 min)

Chromatogram report

Sample Name: 85a.d 85A RID1A, Refractive Index Signal  
 Database name: C:\Cirrus  
 Workbooks\171106\imported-0017.cgm  
 Method name:171106\_POLYSAC  
 Cahnnel: RI

Data acquisition date and time: 11/8/2017 3:40:03 PM  
 Calculation date and time:11/6/2017 4:20:12 PM  
 Acquisition time [min]: 35.006400mins  
 Calibration type: Molecular Weight

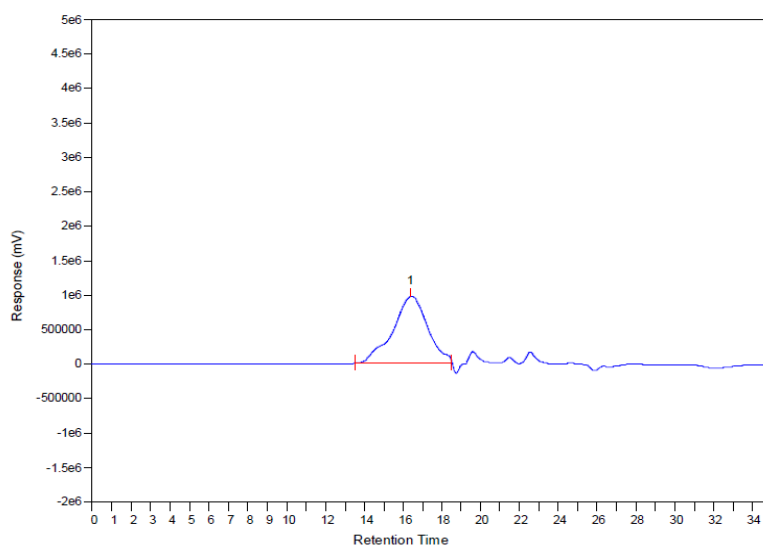

Result of molecular weight calculation (RI)

Peak number:1

|                  |                  |       |        |
|------------------|------------------|-------|--------|
| Peak start [min] | 13.564800        | Mn    | 25388  |
| Peak top [min]   | 16.401600        | Mw    | 74214  |
| Peak end [min]   | 18.504000        | Mz    | 204839 |
|                  |                  | Mz+1  | 368630 |
| Height [mV]      | 971074.197018    | Mv    | 62525  |
| Area [mV*sec]    | 122858659.663425 | Mp    | 37800  |
| Area% [%]        | 100.000000       | Mw/Mn | 2.9232 |

(continued)

### Distribution Plots

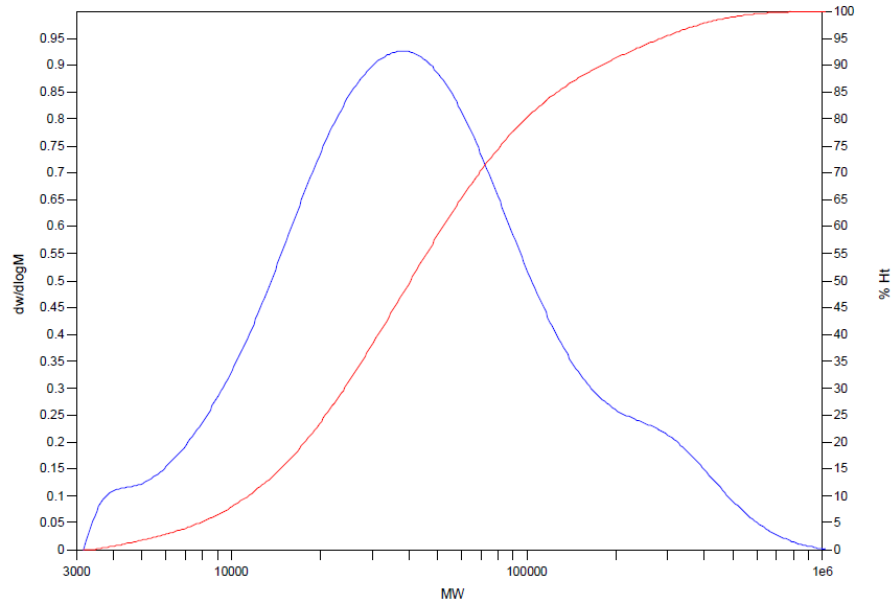

**Figure S3.** GPC profile of the fucoidan F85 after heat treatment (121 °C for 15 min)

Chromatogram report

Sample Name: f85b0.d F85B0 RID1A, Refractive Index Signal  
 Database name: C:\Cirrus  
 Workbooks\171106\imported-0015.cgm  
 Method name:171106\_POLYSAC  
 Cahnnel: RI  
 Data acquisition date and time: 11/8/2017 3:39:20 PM  
 Calculation date and time:11/6/2017 4:20:12 PM  
 Acquisition time [min]: 35.006400mins  
 Calibration type: Molecular Weight

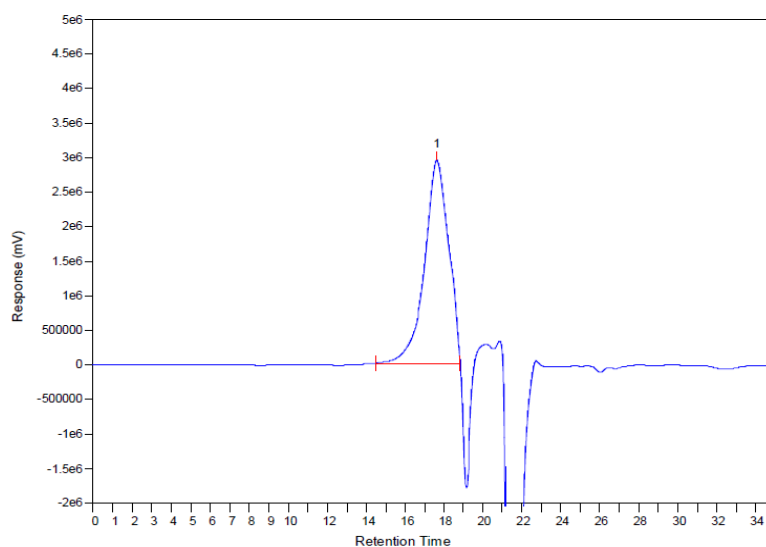

Result of molecular weight calculation (RI)

Peak number:1

|                  |                  |       |        |
|------------------|------------------|-------|--------|
| Peak start [min] | 14.515200        | Mn    | 7834   |
| Peak top [min]   | 17.611200        | Mw    | 13875  |
| Peak end [min]   | 18.806400        | Mz    | 36344  |
|                  |                  | Mz+1  | 99811  |
| Height [mV]      | 2941865.282202   | Mv    | 12352  |
| Area [mV*sec]    | 251793209.886428 | Mp    | 9081   |
| Area% [%]        | 100.000000       | Mw/Mn | 1.7711 |

(continued)

### Distribution Plots

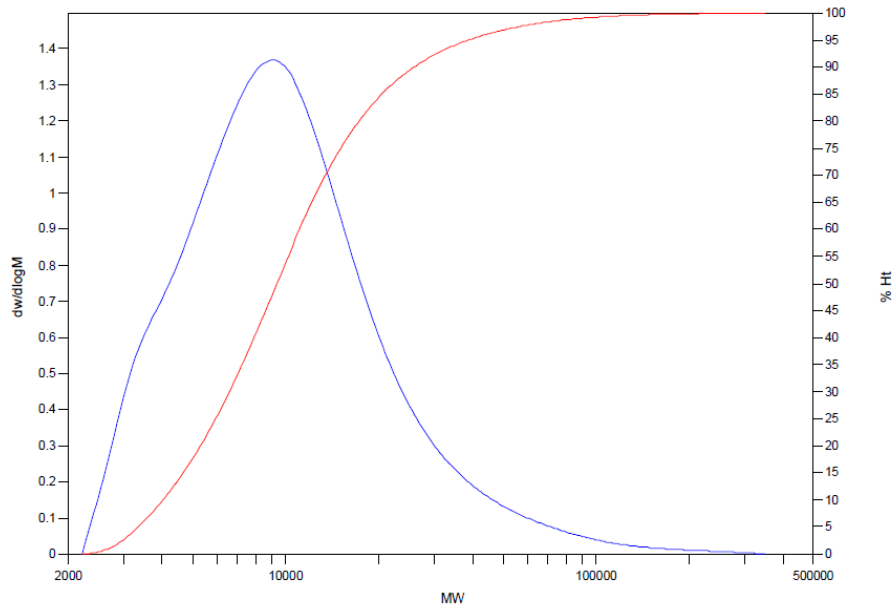

**Figure S4.** GPC profile of the fucoidan F95 before heat treatment (121 °C for 15 min)

Chromatogram report

Sample Name: 95a.d 95A RID 1A, Refractive Index Signal  
 Database name: C:\Cirrus  
 Workbooks\171106\imported-0016.cgm  
 Method name:171106\_POLYSAC  
 Channel: RI

Data acquisition date and time: 11/8/2017 3:39:58 PM  
 Calculation date and time:11/6/2017 4:20:12 PM  
 Acquisition time [min]: 35.006400mins  
 Calibration type: Molecular Weight

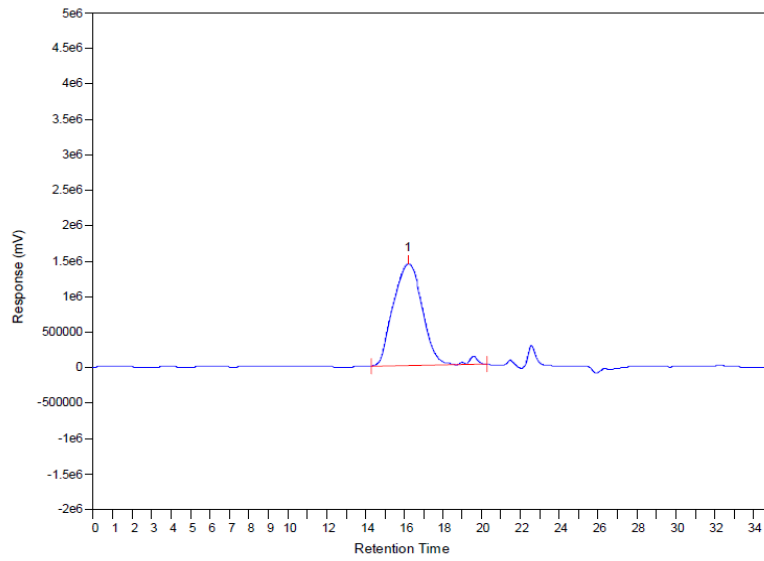

Result of molecular weight calculation (RI)

Peak number:1

|                  |                  |       |        |
|------------------|------------------|-------|--------|
| Peak start [min] | 14.313600        | Mn    | 17576  |
| Peak top [min]   | 16.185600        | Mw    | 62080  |
| Peak end [min]   | 20.289600        | Mz    | 102329 |
|                  |                  | Mz+1  | 142701 |
| Height [mV]      | 1439549.390782   | Mv    | 56711  |
| Area [mV*sec]    | 155343404.733925 | Mp    | 48763  |
| Area% [%]        | 100.000000       | Mw/Mn | 3.5321 |

(continued)



### Distribution Plots

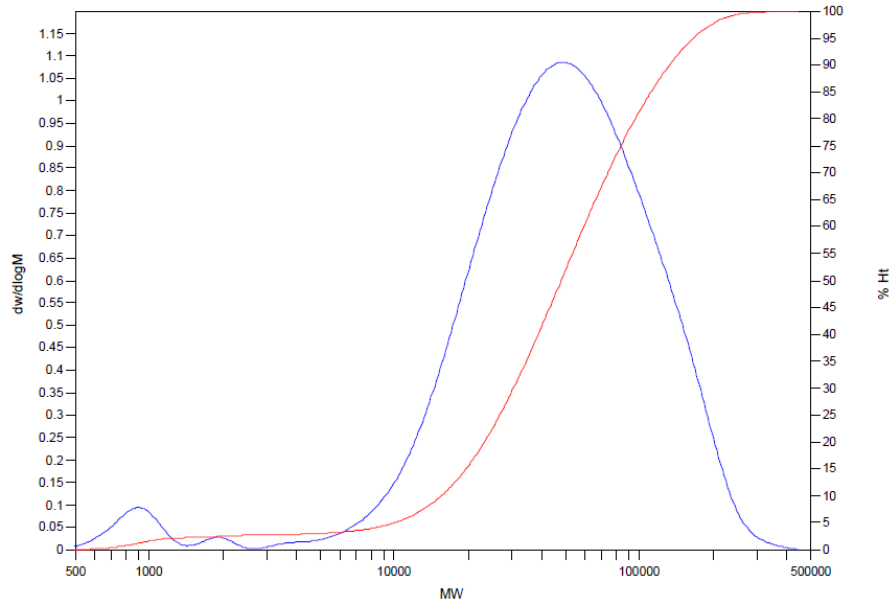

**Figure S5.** GPC profile of the fucoidan F95 after heat treatment (121 °C for 15 min)

Chromatogram report

Sample Name: f95b0.d F95B0 RID1A, Refractive Index Signal  
 Database name: C:\Cirrus  
 Workbooks\171106\imported-0013.cgm  
 Method name:171106\_POLYSAC  
 Cahnnel: RI  
 Data acquisition date and time: 11/8/2017 3:38:50 PM  
 Calculation date and time:11/6/2017 4:20:12 PM  
 Acquisition time [min]: 34.992000mins  
 Calibration type: Molecular Weight

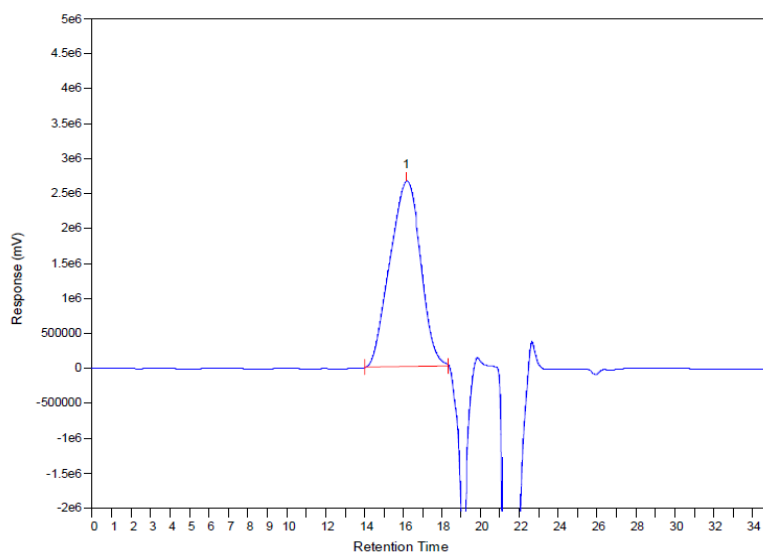

Result of molecular weight calculation (RI)

Peak number:1

|                  |                  |       |        |
|------------------|------------------|-------|--------|
| Peak start [min] | 13.996800        | Mn    | 38587  |
| Peak top [min]   | 16.156800        | Mw    | 76113  |
| Peak end [min]   | 18.345600        | Mz    | 136945 |
|                  |                  | Mz+1  | 206138 |
| Height [mV]      | 2657686.912293   | Mv    | 68991  |
| Area [mV*sec]    | 295778041.155409 | Mp    | 50447  |
| Area% [%]        | 100.000000       | Mw/Mn | 1.9725 |

(continued)

### Distribution Plots

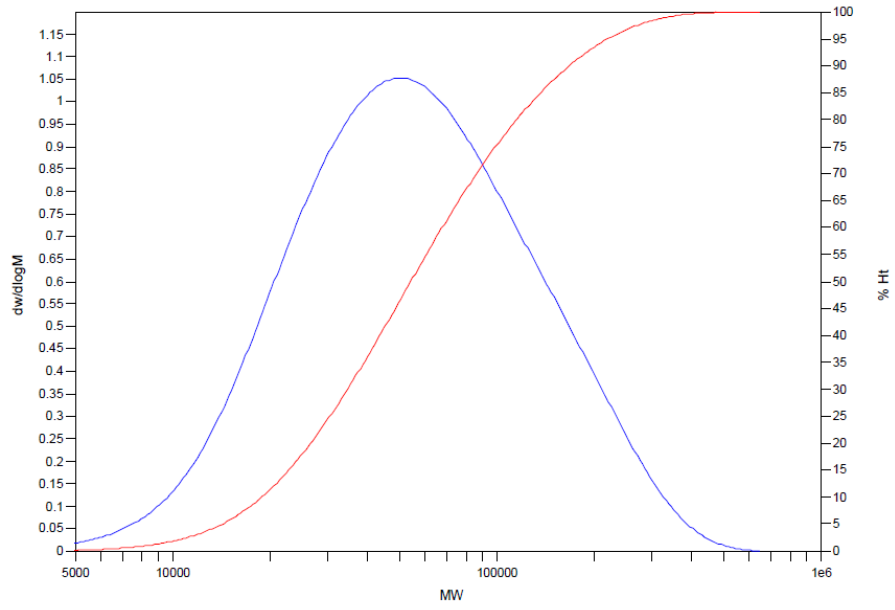

Supplement: marinedrugs-16-00301-s001.pdf [file marinedrugs-16-00301-s001.pdf]
